# Supplementary material for: Incidence of COVID-19 Hospitalisation in Patients with Systemic Lupus Erythematosus: A Nationwide Cohort Study from Denmark
Source: J Clin Med. 2021 Aug 27;10(17):3842. doi: 10.3390/jcm10173842 (PMC8432052; doi:10.3390/jcm10173842)
Supplement: Supplementary file 1 [file jcm-10-03842-s001.zip › jcm-1341861-supplementary.pdf]

**Table S1.** Definition of comorbidities.

| Case definitions are based on                                                                                              |                                                                                                                |
|----------------------------------------------------------------------------------------------------------------------------|----------------------------------------------------------------------------------------------------------------|
| 1)                                                                                                                         | ICD-10 entries in the Danish National Patient Registry with 1 or more ICD-10 codes prior to baseline and/or    |
| 2)                                                                                                                         | ATC codes in the Danish National Prescription Register with prescriptions filled within 1 years from baseline. |
| Chronic lung disease                                                                                                       | ICD-10 codes: J4x or J84x or<br>ATC codes: R03Ax or R03Bx                                                      |
| Diabetes mellitus                                                                                                          | ICD-10 codes: E10-14 or<br>ATC codes: A19x                                                                     |
| Cardiovascular disease                                                                                                     | ICD-10 codes: I1x, I2x, I50x, I6x                                                                              |
| Obesity                                                                                                                    | ICD-10 codes: E66x                                                                                             |
| Cancer                                                                                                                     | ICD-10 codes: Cx excl. C44 (non- melanoma skin cancer)                                                         |
| ICD-10: international classification of diseases 10th edition; ATC: anatomical therapeutic chemical classification system. |                                                                                                                |
